# Supplementary material for: Eliminating biasing signals in lung cancer images for prognosis predictions with deep learning
Source: PubMed Central journal article supplement (PMC6904461; doi:10.1038/s41746-019-0194-x), 2019-12-10
Supplement: 41746_2019_194_MOESM2_ESM.pdf [file 41746_2019_194_MOESM2_ESM.pdf]

# Supplemental Data: Eliminating Biasing Signals in Lung Cancer Images for Prognosis Predictions with Deep Learning

W.A.C. van Amsterdam<sup>\*1</sup>, J.J.C. Verhoeff<sup>2</sup>, P.A. de Jong<sup>1</sup>, T.  
Leiner<sup>1</sup>, and M.J.C. Eijkemans<sup>3</sup>

<sup>1</sup> Department of Radiology,

<sup>2</sup> Department of Radiotherapy,

<sup>3</sup> Biostatistics and Research Support, Julius Center for Health  
Sciences and Primary Care,

University Medical Center Utrecht, Utrecht, The Netherlands,

<sup>\*</sup>w.a.c.vanamsterdam@umcutrecht.nl

October 30, 2019

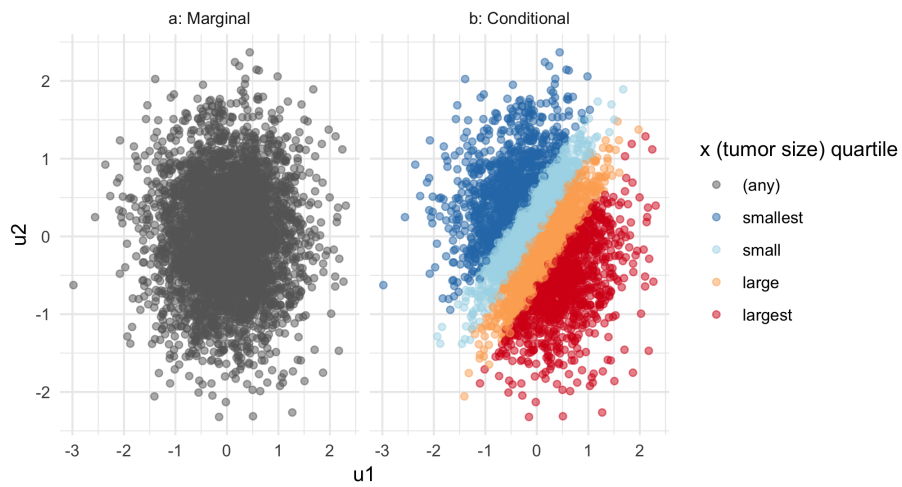

Supplementary Figure 1: Visualization of the artificial correlation induced by conditioning on the collider  $x$ . Through the data generating mechanism,  $u_1$  and  $u_2$  are independently generated Gaussian variables. Facet a shows that the variables are marginally independent. The collider  $x$  is simulated as the difference between  $u_1$  and  $u_2$  with some Gaussian noise ( $x \sim N(u_1 - u_2, 0.05)$ ). This means that for any given value of  $x$ ,  $u_1$  and  $u_2$  are positively correlated. Facet b visualizes this artificial correlation by binning the values of  $x$  for the simulated data in quartiles.

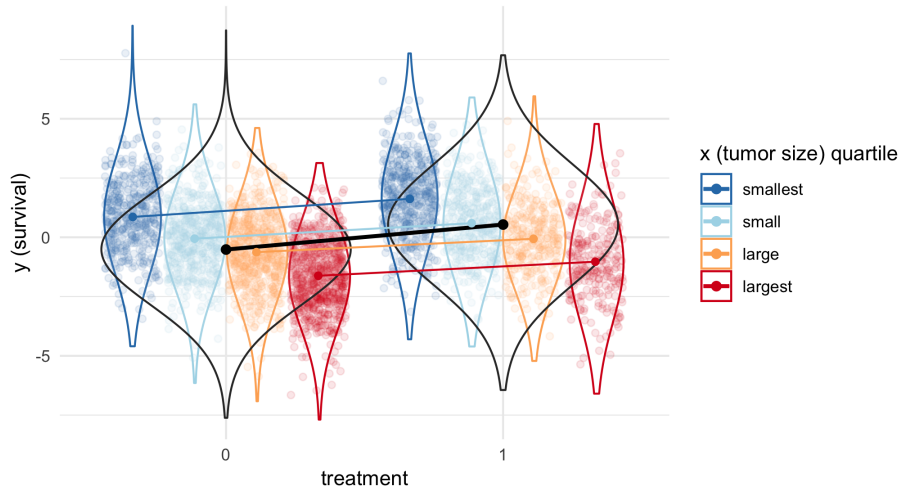

Supplementary Figure 2: Visualization of the biasing effect of conditioning on the collider  $x$  (tumor size). The true treatment effect is 1. The solid black line visualizes the true (causal) difference in  $y$  (survival) between treated and untreated patients when **not** conditioning on the collider  $x$ . When observations are conditioned on the collider  $x$ , visualized here by binning patients in quartiles of  $x$ , the observed difference in survival between treated and untreated patients diminishes, as indicated by the colored lines. This diminished difference in survival between patients occurs when conditioning on the collider  $x$ . Conditioning on  $x$  induces a positive correlation between its parents  $u_1$  and  $u_2$ .  $u_1$  increases the probability of intensive treatment, while  $u_2$  decreases the probability of survival. Due to this artificial association between  $u_1$  and  $u_2$ , induced by conditioning on the collider  $x$ , the difference in survival between treated and untreated patients appears diminished. In reality, **assigning** a patient to intensive treatment will always increase their survival with 1, as reflected in the black line.

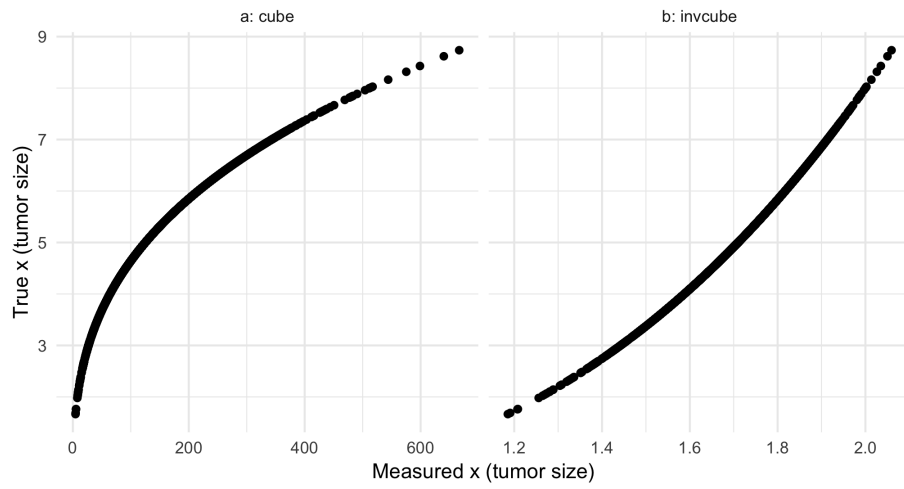

Supplementary Figure 3: Visualization of collider measurement and actual value. Facet a:  $x$  is measured as diameter, while  $y$  is linear in volume of the tumor Facet b:  $x$  is measured by volume, while  $y$  is linear in the diameter of the tumor.
